# Supplementary material for: A Newly Described Bovine Type 2 Scurs Syndrome Segregates with a Frame-Shift Mutation in TWIST1
Source: PubMed Central journal article supplement (PMC3141036; doi:10.1371/journal.pone.0022242), 2011-07-21
Supplement: pone.0022242.s001.pdf [file pone.0022242.s001.pdf]

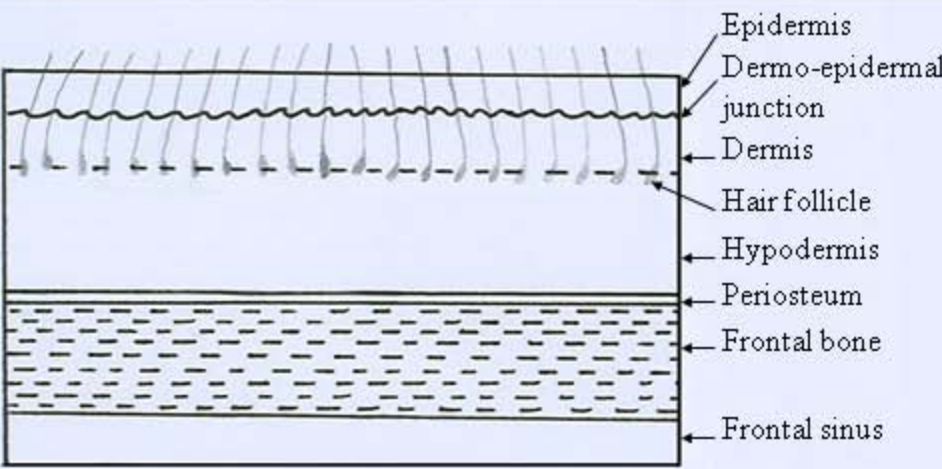

At birth

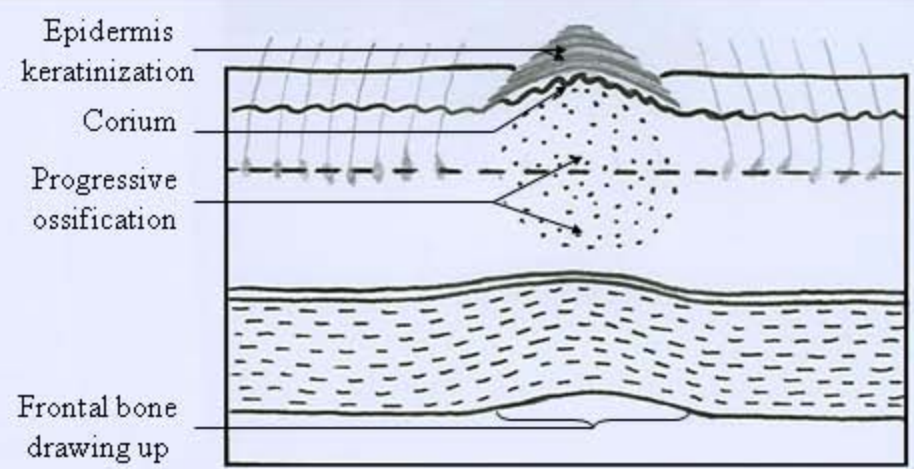

Few weeks after birth

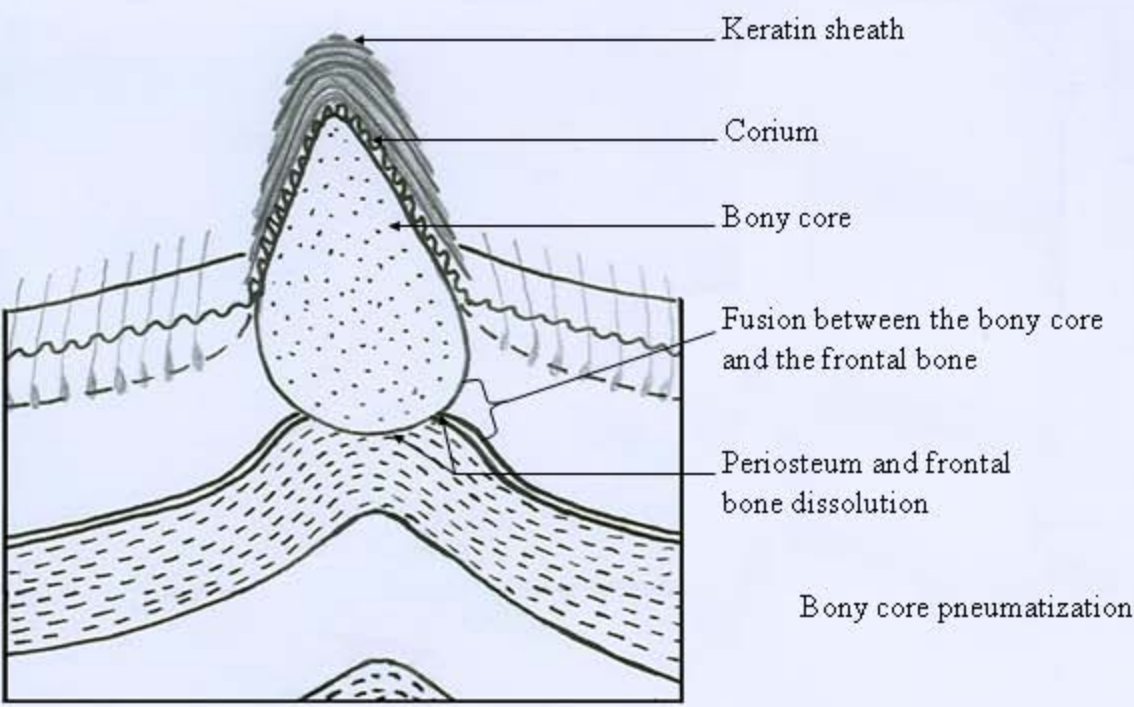

Between 4 and 6 months of age

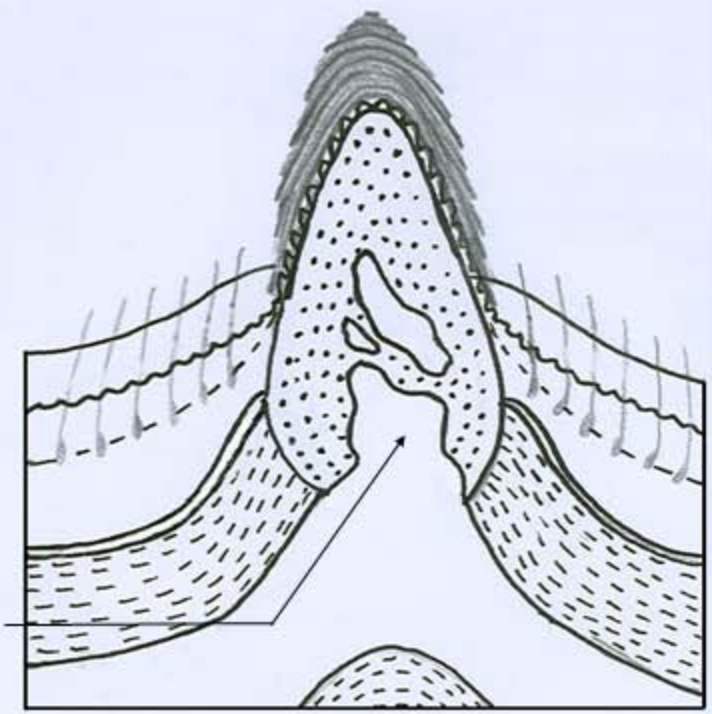

After 6 months of age
